# Supplementary material for: Homogeneous Datasets of Triple Negative Breast Cancers Enable the Identification of Novel Prognostic and Predictive Signatures
Source: PubMed Central journal article supplement (PMC3248403; doi:10.1371/journal.pone.0028403), 2011-12-29
Supplement: pone.0028403.s011.pdf [file pone.0028403.s011.pdf]

## Supplementary Table S2:

List of 355 Affymetrix probe sets used for metagene calculation:

| Metagene      | Affymetrix ProbeSet | GeneSymbol    | DatasetBias<br>KruskalFindCohort |
|---------------|---------------------|---------------|----------------------------------|
| IL-8          | 204470_at           | CXCL1         | 14.8                             |
| IL-8          | 202859_x_at         | IL8           | 35.9                             |
| IL-8          | 211506_s_at         | IL8           | 54                               |
| IL-8          | 209774_x_at         | CXCL2         | 18.1                             |
| VEGF          | 200632_s_at         | NDRG1         | 40                               |
| VEGF          | 210513_s_at         | VEGF          | 46.8                             |
| VEGF          | 211527_x_at         | VEGF          | 72.4                             |
| VEGF          | 210512_s_at         | VEGF          | 45.2                             |
| VEGF          | 212171_x_at         | VEGF          | 60.8                             |
| VEGF          | 202912_at           | ADM           | 26.8                             |
| VEGF          | 221009_s_at         | ANGPTL4       | 36.8                             |
| Proliferation | 206102_at           | KIAA0186      | 50.1                             |
| Proliferation | 209172_s_at         | CENPF         | 39.5                             |
| Proliferation | 203418_at           | CCNA2         | 42.7                             |
| Proliferation | 204026_s_at         | ZWINT         | 42.2                             |
| Proliferation | 203213_at           | CDC2          | 56.6                             |
| Proliferation | 203214_x_at         | CDC2          | 47.6                             |
| Proliferation | 210559_s_at         | CDC2          | 45.6                             |
| Proliferation | 204170_s_at         | CKS2          | 79.1                             |
| Proliferation | 204092_s_at         | STK6          | 55                               |
| Proliferation | 208079_s_at         | STK6          | 38.9                             |
| Proliferation | 203362_s_at         | MAD2L1        | 43.9                             |
| Proliferation | 213226_at           | CCNA2         | 59.5                             |
| Proliferation | 202095_s_at         | BIRC5         | 61.3                             |
| Proliferation | 202613_at           | CTPS          | 49                               |
| Proliferation | 201291_s_at         | TOP2A         | 92.1                             |
| Proliferation | 201292_at           | TOP2A         | 31.5                             |
| Proliferation | 222039_at           | LOC146909     | 49.7                             |
| Proliferation | 204822_at           | TTK           | 52.2                             |
| Proliferation | 202954_at           | UBE2C         | 31.8                             |
| Proliferation | 203755_at           | BUB1B         | 32.3                             |
| Proliferation | 202705_at           | CCNB2         | 35.5                             |
| Proliferation | 204962_s_at         | CENPA         | 65.2                             |
| Proliferation | 209642_at           | BUB1          | 46.5                             |
| Proliferation | 202870_s_at         | CDC20         | 44.2                             |
| Proliferation | 209408_at           | KIF2C         | 46.5                             |
| Proliferation | 221520_s_at         | CDCA8         | 50.7                             |
| Proliferation | 218039_at           | NUSAP1        | 24.5                             |
| Proliferation | 206364_at           | KIF14         | 47.2                             |
| Proliferation | 204641_at           | NEK2          | 28                               |
| Proliferation | 207828_s_at         | CENPF         | 43.6                             |
| Proliferation | 219918_s_at         | ASPM          | 36.8                             |
| Proliferation | 204444_at           | KIF11         | 45                               |
| Proliferation | 218542_at           | C10orf3       | 44.5                             |
| Proliferation | 213008_at           | FUJ10719      | 67.4                             |
| Proliferation | 213007_at           | FUJ10719      | 43.9                             |
| Proliferation | 218009_s_at         | PRC1          | 43.3                             |
| Proliferation | 210052_s_at         | TPX2          | 11.3                             |
| Proliferation | 203764_at           | DLG7          | 53                               |
| Proliferation | 214710_s_at         | CCNB1         | 49                               |
| Proliferation | 218355_at           | KIF4A         | 60                               |
| Proliferation | 202580_x_at         | FOXM1         | 35.4                             |
| Proliferation | 221436_s_at         | CDCA3         | 31.2                             |
| Proliferation | 218755_at           | KIF20A        | 24.8                             |
| Proliferation | 218663_at           | HCAP-G        | 49.2                             |
| Proliferation | 219148_at           | PBK           | 51.1                             |
| Proliferation | 218585_s_at         | RAMP          | 36.8                             |
| Proliferation | 218726_at           | DKFZp762E1312 | 52.2                             |

(continued)

| Metagene     | Affymetrix ProbeSet | GeneSymbol | DatasetBias<br>KruskalFindCohort |
|--------------|---------------------|------------|----------------------------------|
| Basal-like   | 202341_s_at         | TRIM2      | 149.9                            |
| Basal-like   | 202342_s_at         | TRIM2      | 46                               |
| Basal-like   | 215945_s_at         | TRIM2      | 65.5                             |
| Basal-like   | 203074_at           | ANXA8      | 26                               |
| Basal-like   | 202504_at           | TRIM29     | 18.4                             |
| Basal-like   | 211002_s_at         | TRIM29     | 19.6                             |
| Basal-like   | 204268_at           | S100A2     | 26.3                             |
| Basal-like   | 201820_at           | KRT5       | 19.5                             |
| Basal-like   | 204855_at           | SERPIN5    | 31.7                             |
| Basal-like   | 209351_at           | KRT14      | 13.2                             |
| Basal-like   | 205157_s_at         | KRT17      | 19                               |
| Basal-like   | 212236_x_at         | KRT17      | 17.1                             |
| Basal-like   | 209800_at           | KRT16      | 42.2                             |
| Basal-like   | 209126_x_at         | KRT6B      | 26.7                             |
| Basal-like   | 213680_at           | KRT6B      | 19.8                             |
| Basal-like   | 209125_at           | KRT6A      | 26.6                             |
| Basal-like   | 214580_x_at         | KRT6A      | 20.1                             |
| Basal-like   | 1438_at             | EPHB3      | 55.6                             |
| Basal-like   | 204600_at           | EPHB3      | 19.3                             |
| Basal-like   | 218176_at           | MAGEF1     | 64.5                             |
| Basal-like   | 205044_at           | GABRP      | 24.8                             |
| Basal-like   | 202035_s_at         | SFRP1      | 70.3                             |
| Basal-like   | 202036_s_at         | SFRP1      | 51.7                             |
| Basal-like   | 202037_s_at         | SFRP1      | 38.2                             |
| Basal-like   | 209842_at           | SOX10      | 33.6                             |
| Basal-like   | 220425_x_at         | ROPN1      | 39.6                             |
| Basal-like   | 206560_s_at         | MIA        | 47.4                             |
| Basal-like   | 209843_s_at         | SOX10      | 64.4                             |
| Basal-like   | 220624_s_at         | ELF5       | 52.1                             |
| Basal-like   | 220625_s_at         | ELF5       | 38.1                             |
| Basal-like   | 212730_at           | DMN        | 33.5                             |
| Basal-like   | 219615_s_at         | KCNK5      | 21.8                             |
| Basal-like   | 209504_s_at         | PLEKH81    | 25.3                             |
| Basal-like   | 213260_at           | FOXC1      | 26.7                             |
| Basal-like   | 218963_s_at         | KRT23      | 27.2                             |
| Basal-like   | 205487_s_at         | VGLL1      | 25.3                             |
| Basal-like   | 215729_s_at         | VGLL1      | 30.5                             |
| Claudin-CD24 | 201650_at           | KRT19      | 34.3                             |
| Claudin-CD24 | 201596_x_at         | KRT18      | 29.7                             |
| Claudin-CD24 | 209008_x_at         | KRT8       | 20.4                             |
| Claudin-CD24 | 209016_s_at         | KRT7       | 25.7                             |
| Claudin-CD24 | 205980_s_at         | ARHGAP8    | 76                               |
| Claudin-CD24 | 37117_at            | ARHGAP8    | 52.6                             |
| Claudin-CD24 | 203953_s_at         | CLDN3      | 54                               |
| Claudin-CD24 | 203954_x_at         | CLDN3      | 30.8                             |
| Claudin-CD24 | 201428_at           | CLDN4      | 44.2                             |
| Claudin-CD24 | 201839_s_at         | TACSTD1    | 45.1                             |
| Claudin-CD24 | 218186_at           | RAB25      | 16.1                             |
| Claudin-CD24 | 201510_at           | ELF3       | 13.8                             |
| Claudin-CD24 | 210827_s_at         | ELF3       | 46.7                             |
| Claudin-CD24 | 208650_s_at         | CD24       | 48.9                             |
| Claudin-CD24 | 209772_s_at         | CD24       | 47.8                             |
| Claudin-CD24 | 208651_x_at         | CD24       | 40.9                             |
| Claudin-CD24 | 209771_x_at         | CD24       | 71                               |
| Claudin-CD24 | 216379_x_at         | CD24       | 70.1                             |
| Claudin-CD24 | 266_s_at            | CD24       | 48.5                             |
| Apocrine     | 204941_s_at         | ALDH3B2    | 76.4                             |
| Apocrine     | 204942_s_at         | ALDH3B2    | 36.4                             |
| Apocrine     | 211110_s_at         | AR         | 48.6                             |
| Apocrine     | 211621_at           | AR         | 90.5                             |
| Apocrine     | 209173_at           | AGR2       | 39                               |
| Apocrine     | 207131_x_at         | GGT1       | 49.5                             |
| Apocrine     | 208284_x_at         | GGT1       | 46.6                             |
| Apocrine     | 209919_x_at         | GGT1       | 40.9                             |
| Apocrine     | 211417_x_at         | GGT1       | 57.1                             |
| Apocrine     | 215603_x_at         | GGT1       | 73.9                             |
| Apocrine     | 211416_x_at         | GGTLA4     | 81.7                             |
| Apocrine     | 206463_s_at         | DHRS2      | 57.4                             |
| Apocrine     | 214079_at           | DHRS2      | 65.9                             |
| Apocrine     | 211682_x_at         | UGT2B28    | 20.4                             |
| Apocrine     | 206714_at           | ALOX15B    | 69.3                             |
| Apocrine     | 206509_at           | PIP        | 47.3                             |
| Apocrine     | 204667_at           | FOXA1      | 70.6                             |
| Apocrine     | 218211_s_at         | MLPH       | 74.2                             |
| Apocrine     | 214451_at           | TFAP2B     | 42.3                             |
| Apocrine     | 204607_at           | HMGCS2     | 65.2                             |
| Apocrine     | 214243_s_at         | SERHL      | 32.5                             |
| Apocrine     | 217276_x_at         | dj222E13.1 | 38.5                             |
| Apocrine     | 217284_x_at         | dj222E13.1 | 53.1                             |
| Apocrine     | 213441_x_at         | SPDEF      | 48.2                             |
| Apocrine     | 214404_x_at         | SPDEF      | 31.9                             |
| Apocrine     | 220192_x_at         | SPDEF      | 22.8                             |
| Apocrine     | 215686_x_at         | TFAP2B     | 30.1                             |

(continued)

| Metagene  | Affymetrix ProbeSet | GeneSymbol    | DatasetBias<br>KruskalFindCohort |
|-----------|---------------------|---------------|----------------------------------|
| Histone   | 208583_x_at         | HIST1H2AJ     | 55.5                             |
| Histone   | 208523_x_at         | HIST1H2BI     | 44.7                             |
| Histone   | 209398_at           | HIST1H1C      | 26.8                             |
| Histone   | 208180_s_at         | H4FH          | 25.2                             |
| Histone   | 202708_s_at         | HIST2H2BE     | 31.4                             |
| Histone   | 208546_x_at         | HIST1H2BH     | 28.2                             |
| Histone   | 208490_x_at         | HIST1H2BF     | 15.8                             |
| Histone   | 208527_x_at         | HIST1H2BE     | 33.1                             |
| Histone   | 208579_x_at         | H2BFS         | 54.9                             |
| Histone   | 209806_at           | HIST1H2BK     | 20.3                             |
| Histone   | 209911_x_at         | HIST1H2BD     | 46.3                             |
| Histone   | 222067_x_at         | HIST1H2BD     | 17.1                             |
| Histone   | 214290_s_at         | HIST2H2AA     | 17.1                             |
| Histone   | 218280_x_at         | HIST2H2AA     | 18.1                             |
| Histone   | 215071_s_at         | HIST1H2AC     | 18                               |
| Histone   | 210387_at           | HIST1H2BG     | 66.7                             |
| Histone   | 215779_s_at         | HIST1H2BG     | 56.5                             |
| Histone   | 214469_at           | HIST1H2AE     | 21.1                             |
| Histone   | 214455_at           | H2BFL         | 25.6                             |
| Adipocyte | 203980_at           | FABP4         | 21                               |
| Adipocyte | 205913_at           | PLIN          | 19.2                             |
| Adipocyte | 207175_at           | ADIPOQ        | 21.9                             |
| Adipocyte | 209612_s_at         | ADH1B         | 43.5                             |
| Adipocyte | 209613_s_at         | ADH1B         | 42.6                             |
| Adipocyte | 206488_s_at         | CD36          | 36.1                             |
| Adipocyte | 209555_s_at         | CD36          | 24.6                             |
| Adipocyte | 209763_at           | CHRD11        | 55.8                             |
| Stroma    | 202766_s_at         | FBN1          | 114.7                            |
| Stroma    | 207172_x_at         | CDH11         | 127.4                            |
| Stroma    | 207173_x_at         | CDH11         | 139.1                            |
| Stroma    | 200665_s_at         | SPARC         | 115.1                            |
| Stroma    | 202465_at           | PCOLCE        | 151.3                            |
| Stroma    | 201185_at           | PRSS11        | 119.3                            |
| Stroma    | 201069_at           | MMP2          | 130.7                            |
| Stroma    | 202273_at           | PDGFRB        | 170.7                            |
| Stroma    | 204114_at           | NID2          | 136                              |
| Stroma    | 201792_at           | AEBP1         | 136.4                            |
| Stroma    | 201744_s_at         | LUM           | 76.5                             |
| Stroma    | 201438_at           | COL6A3        | 153.1                            |
| Stroma    | 202310_s_at         | COL1A1        | 135.5                            |
| Stroma    | 202403_s_at         | COL1A2        | 107.9                            |
| Stroma    | 202404_s_at         | COL1A2        | 100.2                            |
| Stroma    | 201852_x_at         | COL3A1        | 153.7                            |
| Stroma    | 215076_s_at         | COL3A1        | 115.2                            |
| Stroma    | 211161_s_at         | COL3A1        | 106.2                            |
| Stroma    | 221729_at           | COL5A2        | 118.8                            |
| Stroma    | 221730_at           | COL5A2        | 131.2                            |
| Stroma    | 202311_s_at         | COL1A1        | 129.1                            |
| Stroma    | 203325_s_at         | COL5A1        | 109.9                            |
| Stroma    | 212488_at           | COL5A1        | 127.5                            |
| Stroma    | 212489_at           | COL5A1        | 140                              |
| Stroma    | 210809_s_at         | POSTN         | 86.2                             |
| Stroma    | 212667_at           | SPARC         | 106.6                            |
| Stroma    | 209596_at           | DKFZp564i1922 | 99.6                             |
| Stroma    | 209955_s_at         | FAP           | 100                              |
| Stroma    | 201893_x_at         | DCN           | 113.2                            |
| Stroma    | 211896_s_at         | DCN           | 113.1                            |
| Stroma    | 211813_x_at         | DCN           | 133.7                            |
| Stroma    | 209335_at           | DCN           | 90                               |
| Stroma    | 213001_at           | ANGPTL2       | 144.6                            |
| Stroma    | 213004_at           | ANGPTL2       | 133.1                            |
| Stroma    | 208851_s_at         | THY1          | 108.4                            |
| Stroma    | 213869_x_at         | THY1          | 94.2                             |
| Stroma    | 213909_at           | LRRC15        | 84.9                             |
| Stroma    | 204619_s_at         | CSPG2         | 101.6                            |
| Stroma    | 204620_s_at         | CSPG2         | 125.8                            |
| Stroma    | 221731_x_at         | CSPG2         | 97.8                             |
| Stroma    | 221541_at           | LCRISP2       | 111                              |
| Stroma    | 211571_s_at         | CSPG2         | 185                              |
| Stroma    | 215646_s_at         | CSPG2         | 173.6                            |
| Stroma    | 211719_x_at         | FN1           | 113.2                            |
| Stroma    | 210495_x_at         | FN1           | 121.8                            |
| Stroma    | 216442_x_at         | FN1           | 113                              |
| Stroma    | 212464_s_at         | FN1           | 107.1                            |
| IFN       | 202411_at           | IFI27         | 22.2                             |
| IFN       | 202086_at           | MX1           | 27                               |
| IFN       | 205483_s_at         | G1P2          | 27.1                             |
| IFN       | 203153_at           | IFIT1         | 29.8                             |
| IFN       | 204747_at           | IFIT3         | 32.2                             |
| IFN       | 213797_at           | RSAD2         | 44.9                             |
| IFN       | 204439_at           | IFI44L        | 30.8                             |
| IFN       | 214453_s_at         | IFI44         | 26                               |
| IFN       | 205552_s_at         | OAS1          | 62                               |
| IFN       | 204972_at           | OAS2          | 68.8                             |
| IFN       | 218400_at           | OAS3          | 48.7                             |
| IFN       | 219352_at           | HERC6         | 28.3                             |
| IFN       | 205660_at           | OASL          | 28.5                             |
| IFN       | 210797_s_at         | OASL          | 46.5                             |

| Metagene | Affymetrix ProbeSet | GeneSymbol | DatasetBias<br>KruskalFindCohort |
|----------|---------------------|------------|----------------------------------|
| MHC-1    | 200905_x_at         | HLA-E      | 49.9                             |
| MHC-1    | 217456_x_at         | HLA-E      | 66.5                             |
| MHC-1    | 210514_x_at         | HLA-G      | 20.6                             |
| MHC-1    | 209140_x_at         | HLA-B      | 87.1                             |
| MHC-1    | 208812_x_at         | HLA-B      | 79.9                             |
| MHC-1    | 216526_x_at         | HLA-C      | 67.2                             |
| MHC-1    | 214459_x_at         | HLA-C      | 53.7                             |
| MHC-1    | 211529_x_at         | HLA-G      | 19.4                             |
| MHC-1    | 211528_x_at         | HLA-G      | 43                               |
| MHC-1    | 208729_x_at         | HLA-B      | 40.9                             |
| MHC-1    | 211911_x_at         | HLA-B      | 43.3                             |
| MHC-1    | 217436_x_at         | HLA-J      | 42                               |
| MHC-1    | 204806_x_at         | HLA-F      | 21.7                             |
| MHC-1    | 221875_x_at         | HLA-F      | 26.9                             |
| MHC-1    | 211799_x_at         | HLA-A      | 35.8                             |
| MHC-1    | 213932_x_at         | HLA-A      | 60.9                             |
| MHC-1    | 215313_x_at         | HLA-A      | 63.9                             |
| T-Cell   | 209083_at           | CORO1A     | 65.3                             |
| T-Cell   | 204891_s_at         | LCK        | 44.9                             |
| T-Cell   | 206666_at           | GZMK       | 36.2                             |
| T-Cell   | 201720_s_at         | LAPTM5     | 102                              |
| T-Cell   | 201721_s_at         | LAPTM5     | 46                               |
| T-Cell   | 204912_at           | IL10RA     | 24.1                             |
| T-Cell   | 206150_at           | TNFRSF7    | 49.1                             |
| T-Cell   | 204563_at           | SELL       | 63.7                             |
| T-Cell   | 209670_at           | TRA@       | 41.6                             |
| T-Cell   | 204118_at           | CD48       | 40.3                             |
| T-Cell   | 205831_at           | CD2        | 36.8                             |
| T-Cell   | 210915_x_at         | TRBC1      | 36.9                             |
| T-Cell   | 213193_x_at         | TRBC1      | 39.6                             |
| T-Cell   | 213539_at           | CD3D       | 50.5                             |
| T-Cell   | 211796_s_at         | TRBC1      | 46.9                             |
| T-Cell   | 211339_s_at         | ITK        | 27.4                             |
| T-Cell   | 203416_at           | CD53       | 30.6                             |
| T-Cell   | 211742_s_at         | EVI2B      | 29.4                             |
| T-Cell   | 212588_at           | PTPRC      | 31.2                             |
| T-Cell   | 209671_x_at         | TRA@       | 72                               |
| T-Cell   | 210972_x_at         | TRA@       | 71.2                             |
| T-Cell   | 211902_x_at         | TRA@       | 87.3                             |
| T-Cell   | 220330_s_at         | SAMSN1     | 32.7                             |
| T-Cell   | 38149_at            | KIAA0053   | 42.6                             |
| T-Cell   | 219014_at           | PLAC8      | 27.7                             |
| T-Cell   | 204661_at           | CD52       | 54.7                             |
| T-Cell   | 34210_at            | CD52       | 37.8                             |
| MHC-2    | 201137_s_at         | HLA-DPB1   | 22.2                             |
| MHC-2    | 203932_at           | HLA-DMB    | 38.9                             |
| MHC-2    | 209619_at           | CD74       | 50.4                             |
| MHC-2    | 204670_x_at         | HLA-DRB1   | 27.2                             |
| MHC-2    | 208306_x_at         | HLA-DRB1   | 31.8                             |
| MHC-2    | 209312_x_at         | HLA-DRB1   | 27.1                             |
| MHC-2    | 215193_x_at         | HLA-DRB1   | 29.8                             |
| MHC-2    | 208894_at           | HLA-DRA    | 35.5                             |
| MHC-2    | 210982_s_at         | HLA-DRA    | 48.6                             |
| MHC-2    | 211991_s_at         | HLA-DPA1   | 50.7                             |
| MHC-2    | 212671_s_at         | HLA-DQA1   | 42                               |
| MHC-2    | 217478_s_at         | HLA-DMA    | 35                               |
| MHC-2    | 212998_x_at         | HLA-DQB1   | 48.1                             |
| MHC-2    | 211654_x_at         | HLA-DQB1   | 29.1                             |

(continued)

| Metagene   | Affymetrix ProbeSet | GeneSymbol | DatasetBias<br>KruskalFindCohort |
|------------|---------------------|------------|----------------------------------|
| B-Cell     | 211639_x_at         | IGHM       | 48.5                             |
| B-Cell     | 211633_x_at         | IGHG1      | 65.6                             |
| B-Cell     | 211641_x_at         | IGHG1      | 52.2                             |
| B-Cell     | 211634_x_at         | IGHM       | 45.8                             |
| B-Cell     | 211635_x_at         | IGHG3      | 44.1                             |
| B-Cell     | 211640_x_at         | IGHG1      | 41.1                             |
| B-Cell     | 211798_x_at         | IGLJ3      | 57.6                             |
| B-Cell     | 211881_x_at         | IGLJ3      | 51.5                             |
| B-Cell     | 211637_x_at         | LOC388078  | 51.2                             |
| B-Cell     | 216491_x_at         | IGHM       | 54                               |
| B-Cell     | 211908_x_at         | IGHG1      | 58.8                             |
| B-Cell     | 211650_x_at         | IGHG1      | 46.4                             |
| B-Cell     | 216510_x_at         | IGHG1      | 60.5                             |
| B-Cell     | 217281_x_at         | IGHG1      | 60.3                             |
| B-Cell     | 211643_x_at         | IGKC       | 32.5                             |
| B-Cell     | 213502_x_at         | LOC91316   | 25.6                             |
| B-Cell     | 211430_s_at         | IGH@       | 21.9                             |
| B-Cell     | 209138_x_at         | IGLC2      | 18.1                             |
| B-Cell     | 214677_x_at         | IGL@       | 18.1                             |
| B-Cell     | 215121_x_at         | IGL@       | 21.3                             |
| B-Cell     | 215379_x_at         | IGL@       | 15                               |
| B-Cell     | 221651_x_at         | IGKC       | 28.2                             |
| B-Cell     | 221671_x_at         | IGKC       | 27                               |
| B-Cell     | 211644_x_at         | IGKC       | 36.9                             |
| B-Cell     | 214669_x_at         | LOC440871  | 19.4                             |
| B-Cell     | 211645_x_at         | IGKC       | 29.4                             |
| B-Cell     | 215176_x_at         | IGKC       | 31.4                             |
| B-Cell     | 217378_x_at         | LOC391427  | 35.1                             |
| B-Cell     | 217157_x_at         | IGKC       | 35.3                             |
| B-Cell     | 214836_x_at         | IGKC       | 20                               |
| B-Cell     | 216207_x_at         | IGKV1D-13  | 27.8                             |
| B-Cell     | 217480_x_at         | LOC339562  | 30.3                             |
| B-Cell     | 216576_x_at         | ---        | 32.6                             |
| B-Cell     | 216401_x_at         | ---        | 35.9                             |
| B-Cell     | 215946_x_at         | IGLL1      | 30.5                             |
| B-Cell     | 214916_x_at         | IGH@       | 46.3                             |
| B-Cell     | 216557_x_at         | IGHG1      | 62.6                             |
| B-Cell     | 211868_x_at         | IGHG1      | 46.5                             |
| B-Cell     | 216984_x_at         | IGLJ3      | 46                               |
| B-Cell     | 217148_x_at         | IGLC2      | 41                               |
| B-Cell     | 216542_x_at         | MGC27165   | 68.6                             |
| B-Cell     | 214768_x_at         | IGKC       | 27.7                             |
| B-Cell     | 214973_x_at         | IGHD       | 54.8                             |
| B-Cell     | 217235_x_at         | IGLJ3      | 44.3                             |
| B-Cell     | 215949_x_at         | IGHM       | 69.1                             |
| B-Cell     | 214777_at           | IGKC       | 39                               |
| B-Cell     | 217179_x_at         | IGL@       | 26                               |
| Hemoglobin | 204419_x_at         | HBB        | 133.7                            |
| Hemoglobin | 204848_x_at         | HBB        | 115.9                            |
| Hemoglobin | 209116_x_at         | HBB        | 164.4                            |
| Hemoglobin | 204018_x_at         | HBA1       | 158.4                            |
| Hemoglobin | 209458_x_at         | HBA1       | 154.7                            |
| Hemoglobin | 211745_x_at         | HBA1       | 150.8                            |
| Hemoglobin | 214414_x_at         | HBA2       | 152                              |
| Hemoglobin | 211696_x_at         | HBB        | 155.4                            |
| Hemoglobin | 217232_x_at         | HBB        | 155.2                            |
| Hemoglobin | 217414_x_at         | HBA2       | 153.7                            |
| Hemoglobin | 211699_x_at         | HBA1       | 147.7                            |
| Hemoglobin | 213515_x_at         | HBB        | 158.6                            |
| HOXA       | 206289_at           | HOXA4      | 27.4                             |
| HOXA       | 206847_s_at         | HOXA7      | 43.9                             |
| HOXA       | 209905_at           | HOXA9      | 41.1                             |
| HOXA       | 214651_s_at         | HOXA9      | 27.8                             |
| HOXA       | 213844_at           | HOXA5      | 38.2                             |
| HOXA       | 213147_at           | HOXA10     | 30.1                             |
| HOXA       | 213150_at           | HOXA10     | 20.9                             |
| HOXA       | 213823_at           | HOXA11     | 43                               |
