# Supplementary material for: Homogeneous Datasets of Triple Negative Breast Cancers Enable the Identification of Novel Prognostic and Predictive Signatures
Source: PLoS One. 2011 Dec 29;6(12):e28403. doi: 10.1371/journal.pone.0028403 (PMC3248403; doi:10.1371/journal.pone.0028403)
Supplement: Table S3 — Details of probesets from the supervised signatures. (XLS) [file pone.0028403.s012.xls]

## Sheet: Poor_Progn
Suppl. Table S3a: SAM-Result Poor Prognosis Marker
Affy_ID	GeneSymbol	Numerator(r)	Score(d)	Denominator(s+s0)	q-value(%)	264probe_Signature_FDR_25%	26probe_Signature_FDR_3.5%	Kruskal-Wallis rank sum statistics	Max. correlation to metagene	Assigned to metagene (corr. cutoff 0.2)
211506_s_at	IL8	0.223581	3.75418	0.0595552	0	included	included	54	0.818004	IL8
211708_s_at	SCD	0.210346	3.37739	0.0622807	0	included	included	102.6	0.3417	Apocrine
39249_at	AQP3	0.163973	3.30811	0.0495671	0	included	included	23.1	0.371947	Apocrine
202859_x_at	IL8	0.184087	3.29879	0.0558044	0	included	included	35.9	0.873861	IL8
202627_s_at	SERPINE1	0.131689	3.13615	0.0419905	0	included	included	143.2	0.678632	Stroma
212909_at	LYPDC1	0.141379	3.11758	0.0453488	0	included	included	28.9	0.248132	Prolif
200737_at	PGK1	0.0905513	3.08951	0.0293093	0	included	included	59.7	0.434572	VEGF
204344_s_at	SEC23A	0.147658	3.07469	0.0480238	0	included	included	155.3	0.303415	Stroma
205810_s_at	WASL	0.13836	3.07097	0.0450543	0	included	included	112.6	-0.243113	HOX
217356_s_at	PGK1	0.108541	3.03086	0.0358119	0	included	included	95	0.356682	VEGF
215779_s_at	HIST1H2BG	0.16013	3.01703	0.0530754	0	included	included	56.5	0.806642	Histone
212344_at	SULF1	0.118768	3.00803	0.0394837	0	included	included	128.7	0.732465	Stroma
209875_s_at	SPP1	0.14108	3.0021	0.0469938	0	included	included	37.1	0.406583	VEGF
219434_at	TREM1	0.127544	2.98197	0.0427716	0	included	included	33.1	0.456846	IL8
219508_at	GCNT3	0.117579	2.96632	0.0396381	0	included	included	32.2	0.0936005	unclassified
208881_x_at	IDI1	0.0950774	2.95915	0.0321299	0	included	included	67.9	0.389713	Histone
215427_s_at	ZCCHC14	0.106073	2.95841	0.0358547	0	included	included	58.4	0.170463	unclassified
214603_at	MAGEA2	0.21775	2.95621	0.0736585	0	included	included	22.5	0.0826673	unclassified
219875_s_at	PNAS-4	0.142631	2.95125	0.0483289	0	included	included	156.6	0.215107	Histone
204083_s_at	TPM2	0.119645	2.948	0.040585	0	included	included	81.1	0.519766	Stroma
218468_s_at	GREM1	0.131268	2.93692	0.0446959	0	included	included	73.2	0.670729	Stroma
204615_x_at	IDI1	0.0957599	2.90209	0.0329969	0	included	included	64.9	0.391039	Histone
212354_at	SULF1	0.10782	2.85818	0.0377232	3.45382	included	included	96.1	0.769628	Stroma
218469_at	GREM1	0.105923	2.83604	0.037349	3.45382	included	included	66.2	0.687571	Stroma
212353_at	SULF1	0.104329	2.80897	0.0371414	3.45382	included	included	86.4	0.78181	Stroma
202497_x_at	SLC2A3	0.128474	2.79738	0.0459264	3.45382	included	included	68.1	0.343529	IL8
202539_s_at	HMGCR	0.0679338	2.74475	0.0247504	7.74133	included	no	37	0.37265	Apocrine
214522_x_at	HIST1H3D	0.148675	2.74467	0.0541687	7.74133	included	no	50.5	0.704266	Histone
212942_s_at	KIAA1199	0.116908	2.73264	0.0427822	7.74133	included	no	52.2	0.531606	Stroma
219773_at	NOX4	0.0900416	2.69262	0.0334401	7.74133	included	no	73.9	0.68574	Stroma
205680_at	MMP10	0.126091	2.66443	0.0473239	11.2249	included	no	20.9	0.260291	Stroma
202912_at	ADM	0.106412	2.6565	0.0400573	11.2249	included	no	26.8	0.741479	VEGF
201108_s_at	THBS1	0.0983809	2.65436	0.0370638	11.2249	included	no	101.1	0.597668	Stroma
210387_at	HIST1H2BG	0.145986	2.6527	0.055033	11.2249	included	no	66.7	0.755556	Histone
205227_at	IL1RAP	0.11061	2.64759	0.0417778	11.2249	included	no	26.7	0.28276	IL8
201695_s_at	NP	0.0652344	2.64547	0.0246589	11.2249	included	no	52.1	0.252769	Prolif
217073_x_at	APOA1	0.0885335	2.5954	0.0341116	11.2249	included	no	60.4	-0.15804	unclassified
201109_s_at	THBS1	0.107438	2.59504	0.0414013	11.2249	included	no	76.1	0.590518	Stroma
215446_s_at	LOX	0.0988414	2.59326	0.0381147	11.2249	included	no	66.1	0.75629	Stroma
205443_at	SNAPC1	0.0665093	2.59221	0.0256574	11.2249	included	no	58.5	0.231184	VEGF
209978_s_at	LPA	0.101249	2.59057	0.0390839	11.2249	included	no	54.3	-0.128021	unclassified
201506_at	TGFBI	0.0912459	2.57089	0.035492	11.2249	included	no	64.3	0.596224	Stroma
208577_at	HIST1H3C	0.0863486	2.56898	0.0336121	11.2249	included	no	39.2	-0.265422	B.Cell
219927_at	C14orf111	0.129611	2.55194	0.0507891	13.8153	included	no	150.7	0.165709	unclassified
212210_at	DKFZP586J0619	0.106943	2.53888	0.042122	13.8153	included	no	77.6	0.170351	unclassified
202134_s_at	WWTR1	0.107472	2.52724	0.0425256	13.8153	included	no	45.3	0.395773	Basal
211162_x_at	SCD	0.14004	2.52613	0.0554363	13.8153	included	no	108.2	0.338533	Apocrine
218073_s_at	FLJ10407	0.0726751	2.52399	0.0287937	13.8153	included	no	51.7	0.538444	Prolif
212887_at	SEC23A	0.0677244	2.52357	0.0268367	13.8153	included	no	79.5	0.51629	Stroma
206354_at	SLCO1B3	0.105696	2.52178	0.0419131	13.8153	included	no	48.1	0.110639	unclassified
201324_at	EMP1	0.0890745	2.52005	0.0353464	13.8153	included	no	19.7	0.356772	Stroma
212902_at	SEC24A	0.0643904	2.51749	0.0255772	13.8153	included	no	83.9	0.304976	Histone
214978_s_at	PPFIA4	0.111829	2.51197	0.0445186	13.8153	included	no	30.2	0.497114	VEGF
204338_s_at	RGS4	0.136898	2.51109	0.0545175	13.8153	included	no	129.2	0.290613	Stroma
210089_s_at	LAMA4	0.116563	2.50211	0.0465859	13.8153	included	no	90	0.337622	Stroma
214580_x_at	KRT6A	0.180484	2.50183	0.0721407	13.8153	included	no	20.1	0.307277	IL8
39248_at	AQP3	0.130668	2.49866	0.0522954	13.8153	included	no	14.3	0.387401	Apocrine
214725_at	RPESP	0.118869	2.49581	0.0476273	13.8153	included	no	19.7	-0.205425	B.Cell
219104_at	RNF141	0.0773971	2.49245	0.0310526	13.8153	included	no	50	0.226258	Apocrine
211840_s_at	PDE4D	0.0981832	2.4894	0.0394405	13.8153	included	no	37.9	0.0945344	unclassified
200738_s_at	PGK1	0.0605369	2.4825	0.0243855	13.8153	included	no	88.1	0.464322	VEGF
203099_s_at	CDYL	0.13827	2.4798	0.0557586	13.8153	included	no	121.5	0.246589	Prolif
207933_at	ZP2	0.0821947	2.47707	0.0331822	13.8153	included	no	56.6	0.248951	Apocrine
202604_x_at	ADAM10	0.0586251	2.47616	0.0236758	13.8153	included	no	80.5	0.218084	IL8
221291_at	ULBP2	0.11752	2.47171	0.0475461	13.8153	included	no	102.1	0.253429	IL8
214455_at	H2BFL	0.147618	2.46363	0.0599189	13.8153	included	no	25.6	0.776984	Histone
210431_at	ALPPL2	0.0775807	2.46319	0.031496	13.8153	included	no	78.3	0.126536	unclassified
210845_s_at	PLAUR	0.0657357	2.45375	0.0267899	14.9666	included	no	36	0.44231	IL8
211160_x_at	ACTN1	0.07232	2.43965	0.0296437	14.9666	included	no	85.6	0.494724	Stroma
208547_at	HIST1H2BB	0.0987084	2.42487	0.0407067	14.9666	included	no	61.1	0.539427	Histone
219837_s_at	CYTL1	0.112283	2.41412	0.0465111	14.9666	included	no	42	-0.383667	CLDN3
201037_at	PFKP	0.0921135	2.4091	0.0382357	14.9666	included	no	38.6	0.401888	Prolif
200989_at	HIF1A	0.053913	2.40506	0.0224165	14.9666	included	no	60.8	0.364705	Stroma
208490_x_at	HIST1H2BF	0.0842741	2.3968	0.035161	14.9666	included	no	15.8	0.905792	Histone
204298_s_at	LOX	0.0975302	2.38728	0.0408541	16.6482	included	no	87.5	0.557027	Stroma
201888_s_at	IL13RA1	0.0688959	2.38694	0.0288637	16.6482	included	no	55.8	0.345015	Apocrine
220768_s_at	CSNK1G3	0.0496678	2.38648	0.0208121	16.6482	included	no	111.3	0.156973	unclassified
210405_x_at	TNFRSF10B	0.0953351	2.38349	0.0399982	16.6482	included	no	71.3	-0.182951	unclassified
206315_at	CRLF1	0.163254	2.38151	0.0685505	16.6482	included	no	54	0.267701	Basal
217911_s_at	BAG3	0.0546025	2.37797	0.0229618	16.6482	included	no	81.3	-0.346604	MHC1
219886_at	LRRIQ2	0.0872345	2.36941	0.036817	16.6482	included	no	51.8	0.208192	Prolif
202628_s_at	SERPINE1	0.106117	2.3688	0.0447979	16.6482	included	no	138.4	0.694197	Stroma
209305_s_at	GADD45B	0.069126	2.36568	0.0292204	16.6482	included	no	80.1	-0.30775	Prolif
210995_s_at	TRIM23	0.0849122	2.36479	0.0359069	16.6482	included	no	72.9	0.129223	unclassified
206409_at	TIAM1	0.0855594	2.3624	0.0362172	16.6482	included	no	49.3	-0.170889	unclassified
201325_s_at	EMP1	0.0846779	2.35929	0.0358913	16.6482	included	no	30.9	0.341977	Stroma
219366_at	AVEN	0.0545388	2.35745	0.0231347	16.6482	included	no	70.5	-0.232487	Hemoglobin
210435_at	NBR2	0.118361	2.35501	0.0502595	16.6482	included	no	59.3	-0.140123	unclassified
205199_at	CA9	0.0972718	2.35045	0.0413843	16.6482	included	no	26.4	0.491687	VEGF
209803_s_at	PHLDA2	0.0972006	2.34142	0.0415135	16.6482	included	no	27.2	0.280532	IL8
205499_at	SRPX2	0.0771682	2.33385	0.0330648	16.6482	included	no	62	0.718366	Stroma
214216_s_at	KIAA0217	0.135447	2.32985	0.0581354	16.6482	included	no	151.5	-0.30125	HOX
217834_s_at	SYNCRIP	0.0674687	2.321	0.0290688	16.6482	included	no	67.9	0.583184	Prolif
204883_s_at	HUS1	0.0834915	2.31064	0.0361335	16.6482	included	no	87.7	0.254959	Prolif
208527_x_at	HIST1H2BE	0.0734868	2.30533	0.0318769	19.0724	included	no	33.1	0.919547	Histone
208129_x_at	RUNX1	0.062702	2.30268	0.02723	19.0724	included	no	68.3	0.259612	VEGF
214612_x_at	MAGEA6	0.196233	2.30207	0.0852419	19.0724	included	no	19.8	-0.131216	unclassified
215488_at	VMD2	0.0762843	2.29887	0.0331834	19.0724	included	no	75.4	-0.157911	unclassified
206512_at	U2AF1L1	0.0861948	2.29807	0.0375074	19.0724	included	no	103.9	-0.0805237	unclassified
217428_s_at	COL10A1	0.130289	2.29207	0.0568431	19.0724	included	no	72	0.739818	Stroma
216796_s_at	- - -	0.0659219	2.29045	0.0287812	19.0724	included	no	102.2	-0.119144	unclassified
208427_s_at	ELAVL2	0.115496	2.28386	0.0505707	19.0724	included	no	41.3	0.273714	Prolif
213506_at	F2RL1	0.0974666	2.28344	0.0426841	19.0724	included	no	13	0.312572	Apocrine
208180_s_at	H4FH	0.0986098	2.28221	0.043208	19.0724	included	no	25.2	0.821848	Histone
215997_s_at	CUL4B	0.0565312	2.28212	0.0247713	19.0724	included	no	105.2	0.195808	unclassified
203000_at	STMN2	0.120965	2.28171	0.0530151	19.0724	included	no	72.8	0.293131	Stroma
202388_at	RGS2	0.0991778	2.27778	0.0435414	19.0724	included	no	21.7	-0.210244	IFN
205523_at	HAPLN1	0.157351	2.27769	0.0690834	19.0724	included	no	42.4	0.284705	VEGF
217675_at	LOC201501	0.0843666	2.27302	0.0371165	19.0724	included	no	114.2	0.214918	VEGF
203393_at	HES1	0.0720779	2.27126	0.0317347	19.0724	included	no	65.5	-0.135834	unclassified
214702_at	FN1	0.10146	2.26827	0.0447301	19.0724	included	no	90.7	0.450987	Stroma
209601_at	ACOX1	0.0628437	2.26775	0.0277119	19.0724	included	no	22.1	-0.115526	unclassified
204475_at	MMP1	0.187226	2.26561	0.0826381	19.0724	included	no	51.8	0.369669	Stroma
220623_s_at	TSGA10	0.0893001	2.25782	0.0395514	19.0724	included	no	23.5	0.196916	unclassified
216729_at	- - -	0.0974525	2.25211	0.0432717	19.0724	included	no	77.9	-0.122993	unclassified
210990_s_at	LAMA4	0.0843054	2.25066	0.0374581	19.0724	included	no	77	-0.328007	Prolif
210257_x_at	CUL4B	0.0541345	2.24601	0.0241025	19.0724	included	no	116.2	0.144132	unclassified
220759_at	FAM12B	0.0880086	2.24161	0.0392614	21.0893	included	no	38.1	0.416688	Apocrine
212543_at	AIM1	0.0664726	2.24119	0.0296595	21.0893	included	no	13.8	0.308431	Apocrine
219856_at	SARG	0.148229	2.24045	0.0661601	21.0893	included	no	41.4	0.331939	CLDN3
207696_at	FUT9	0.0885746	2.23767	0.0395834	21.0893	included	no	38.1	-0.172421	unclassified
220031_at	ZA20D1	0.0679869	2.23661	0.0303972	21.0893	included	no	48.7	-0.121695	unclassified
201110_s_at	THBS1	0.0884832	2.2322	0.0396394	21.0893	included	no	68.4	0.593182	Stroma
208394_x_at	ESM1	0.0652413	2.22545	0.029316	21.0893	included	no	65.4	0.405805	VEGF
215649_s_at	MVK	0.0843934	2.21795	0.0380502	21.0893	included	no	89.1	0.230096	Histone
206686_at	PDK1	0.116917	2.2058	0.0530042	21.0893	included	no	137.4	0.295174	VEGF
206547_s_at	PPEF1	0.0829611	2.20292	0.0376597	21.0893	included	no	61.5	0.382312	Stroma
221679_s_at	ABHD6	0.08505	2.19965	0.0386653	21.0893	included	no	125	-0.189694	unclassified
204337_at	RGS4	0.0759597	2.19612	0.0345881	21.0893	included	no	62.7	0.559403	Stroma
210233_at	IL1RAP	0.112621	2.19135	0.0513937	21.0893	included	no	20.1	0.205848	IL8
201170_s_at	BHLHB2	0.0620104	2.18478	0.0283829	22.6005	included	no	63.9	0.386524	Stroma
211338_at	IFNA2	0.0950478	2.18476	0.0435049	22.6005	included	no	26.8	-0.228181	MHC2
216650_at	LOC442165	0.100562	2.184	0.0460449	22.6005	included	no	104.1	-0.25996	Stroma
201903_at	UQCRC1	0.0506272	2.1792	0.023232	22.6005	included	no	66.4	0.241219	Histone
202740_at	ACY1	0.0581205	2.17892	0.026674	22.6005	included	no	36.8	0.400683	Apocrine
208523_x_at	HIST1H2BI	0.0798946	2.17509	0.0367315	22.6005	included	no	44.7	0.776274	Histone
208487_at	LMX1B	0.0621578	2.17296	0.0286051	22.6005	included	no	84.3	-0.0993827	unclassified
207370_at	IBSP	0.0980719	2.17089	0.0451759	22.6005	included	no	95.1	0.237242	VEGF
206113_s_at	RAB5A	0.0649052	2.17059	0.0299021	22.6005	included	no	179	0.21077	Histone
215733_x_at	CTAG2	0.160176	2.16897	0.073849	22.6005	included	no	66.7	0.199261	unclassified
210805_x_at	RUNX1	0.0728564	2.16799	0.0336054	22.6005	included	no	76.6	0.250741	VEGF
205924_at	RAB3B	0.0908839	2.16281	0.0420212	22.6005	included	no	33	0.456786	Apocrine
216672_s_at	MYT1L	0.0745291	2.15291	0.0346179	22.6005	included	no	19.1	-0.126774	unclassified
206569_at	IL24	0.090163	2.15219	0.0418936	22.6005	included	no	85.1	0.196638	unclassified
211617_at	ALDOAP2	0.0876428	2.15085	0.040748	22.6005	included	no	59.9	-0.0894097	unclassified
222219_s_at	TLE6	0.0668522	2.14993	0.0310951	22.6005	included	no	33.9	0.17296	unclassified
207328_at	ALOX15	0.0835105	2.14893	0.0388614	22.6005	included	no	41.8	0.249928	Apocrine
202363_at	SPOCK	0.0816529	2.14701	0.038031	22.6005	included	no	75.9	0.750604	Stroma
202543_s_at	GMFB	0.0574303	2.14694	0.0267498	22.6005	included	no	70.3	0.265389	Prolif
213563_s_at	GCP2	0.0692678	2.14546	0.0322857	22.6005	included	no	55.6	-0.195148	unclassified
216268_s_at	JAG1	0.0689577	2.14154	0.0322	22.6005	included	no	66	0.485605	Stroma
210874_s_at	NAT6	0.0741529	2.139	0.034667	22.6005	included	no	42.8	-0.121479	unclassified
209101_at	CTGF	0.0979777	2.13897	0.0458059	22.6005	included	no	71.6	0.6815	Stroma
211758_x_at	TXNDC9	0.0470234	2.13855	0.0219884	22.6005	included	no	46.6	0.243705	Prolif
201559_s_at	CLIC4	0.0794444	2.13703	0.0371751	22.6005	included	no	170.8	0.225564	B.Cell
213640_s_at	LOX	0.119229	2.13349	0.0558843	22.6005	included	no	120.1	0.343063	Stroma
206788_s_at	CBFB	0.0755443	2.13328	0.0354123	22.6005	included	no	110	-0.219737	HOX
219232_s_at	EGLN3	0.0749535	2.13302	0.0351396	22.6005	included	no	35.7	0.387523	Apocrine
219328_at	DDX31	0.0942453	2.12914	0.0442646	22.6005	included	no	106	-0.204334	Apocrine
202540_s_at	HMGCR	0.0533693	2.12827	0.0250764	22.6005	included	no	53.6	-0.353598	MHC1
209398_at	HIST1H1C	0.0922392	2.12794	0.0433468	22.6005	included	no	26.8	0.812773	Histone
215574_at	- - -	0.0804535	2.1238	0.0378819	22.6005	included	no	61.4	-0.180433	unclassified
218036_x_at	NMD3	0.0667025	2.1206	0.0314545	22.6005	included	no	111.7	0.201329	Histone
210750_s_at	DLGAP1	0.0839087	2.11756	0.0396252	22.6005	included	no	31.2	0.117376	unclassified
40524_at	PTPN21	0.0745331	2.11687	0.0352091	22.6005	included	no	36.5	-0.312344	T.Cell
201275_at	FDPS	0.0575557	2.1125	0.0272453	22.6005	included	no	116.8	0.477857	Prolif
204614_at	SERPINB2	0.116242	2.11179	0.0550443	22.6005	included	no	15.6	0.257671	Basal
201043_s_at	ANP32A	0.0952402	2.10907	0.0451574	22.6005	included	no	178.1	-0.142577	unclassified
201091_s_at	CBX3	0.0566315	2.10769	0.026869	22.6005	included	no	107.7	0.389422	Prolif
37512_at	RODH	0.0838187	2.10562	0.0398072	22.6005	included	no	50.6	0.354134	Stroma
203108_at	GPCR5A	0.149417	2.10531	0.0709714	22.6005	included	no	19.2	0.45856	CLDN3
219948_x_at	FLJ21934	0.123439	2.10477	0.058647	22.6005	included	no	38.8	0.146928	unclassified
215646_s_at	CSPG2	0.115425	2.09809	0.0550143	22.6005	included	no	173.6	0.751829	Stroma
213983_s_at	SCC-112	0.091564	2.09794	0.0436446	22.6005	included	no	60.9	0.184472	unclassified
202057_at	KPNA1	0.0687226	2.09778	0.0327596	22.6005	included	no	88.5	-0.2358	MHC1
208613_s_at	FLNB	0.0726183	2.0969	0.0346313	22.6005	included	no	25.3	0.432041	VEGF
220003_at	FLJ11004	0.0858269	2.09543	0.0409591	22.6005	included	no	41.7	-0.102008	unclassified
201208_s_at	TNFAIP1	0.0785363	2.09519	0.037484	22.6005	included	no	98.3	0.210608	IL8
209822_s_at	VLDLR	0.0616667	2.09508	0.029434	22.6005	included	no	26.9	0.298116	VEGF
209909_s_at	TGFB2	0.104699	2.09213	0.0500444	22.6005	included	no	32.5	0.186746	unclassified
210467_x_at	MAGEA12	0.113891	2.08849	0.0545327	22.6005	included	no	64.2	-0.118538	unclassified
215432_at	BUCS1	0.100019	2.08504	0.0479701	22.6005	included	no	22.5	0.540411	Apocrine
209122_at	ADFP	0.0732805	2.08396	0.0351641	22.6005	included	no	66.6	0.251001	VEGF
210196_s_at	PSG1	0.102859	2.08314	0.049377	22.6005	included	no	41.8	-0.235956	Stroma
210876_at	ANXA2	0.0630326	2.08126	0.0302858	22.6005	included	no	54.3	0.189096	unclassified
208546_x_at	HIST1H2BH	0.0994539	2.0795	0.0478259	22.6005	included	no	28.2	0.847279	Histone
216414_at	- - -	0.0683725	2.07854	0.0328945	22.6005	included	no	69.1	-0.105688	unclassified
212812_at	- - -	0.0594284	2.0784	0.0285933	22.6005	included	no	41.8	-0.335572	MHC1
219733_s_at	SLC27A5	0.0871794	2.07771	0.0419593	22.6005	included	no	28.7	0.283791	Prolif
215254_at	DSCR1	0.0906877	2.07368	0.0437326	22.6005	included	no	84.6	-0.225854	T.Cell
207319_s_at	CDC2L5	0.0598478	2.07044	0.0289059	22.6005	included	no	170.7	0.173316	unclassified
211668_s_at	PLAU	0.0781715	2.06799	0.0378007	22.6005	included	no	111.6	0.584608	Stroma
201792_at	AEBP1	0.0813761	2.06596	0.0393891	22.6005	included	no	136.4	0.896153	Stroma
202238_s_at	NNMT	0.0825088	2.06504	0.039955	26.3673	included	no	110.7	0.715841	Stroma
219356_s_at	SNF7DC2	0.0595866	2.05978	0.0289286	26.3673	included	no	62.9	0.454234	IFN
210904_s_at	IL13RA1	0.0758054	2.05882	0.0368198	26.3673	included	no	143	0.343716	Apocrine
221552_at	ABHD6	0.0741537	2.05878	0.0360183	26.3673	included	no	53.8	0.307419	Apocrine
221009_s_at	ANGPTL4	0.093873	2.05795	0.0456148	26.3673	included	no	36.8	0.628463	VEGF
214968_at	DDX51	0.083243	2.05485	0.0405105	26.3673	included	no	136.2	-0.132268	unclassified
201196_s_at	AMD1	0.0630207	2.05456	0.0306737	26.3673	included	no	51.8	0.475464	Prolif
212444_at	- - -	0.134489	2.05416	0.0654717	26.3673	included	no	27	0.374988	CLDN3
204845_s_at	ENPEP	0.0772645	2.05341	0.0376273	26.3673	included	no	64.7	0.372118	Stroma
208496_x_at	HIST1H3G	0.108283	2.05337	0.0527343	26.3673	included	no	44.5	0.657279	Histone
215464_s_at	TAX1BP3	0.0501596	2.05173	0.0244474	26.3673	included	no	74.6	0.383345	Stroma
212797_at	SORT1	0.0992358	2.05072	0.0483907	26.3673	included	no	107.9	-0.165802	unclassified
204596_s_at	STC1	0.054105	2.05028	0.026389	26.3673	included	no	26.8	0.391599	VEGF
210623_at	LOC51035	0.0805624	2.05024	0.0392942	26.3673	included	no	28.2	-0.125565	unclassified
216915_s_at	PTPN12	0.0925619	2.05021	0.0451475	26.3673	included	no	201.2	0.1953	unclassified
208144_s_at	PP1345	0.0669063	2.04948	0.0326454	26.3673	included	no	43.6	-0.162213	unclassified
214469_at	HIST1H2AE	0.127561	2.04918	0.0622496	26.3673	included	no	21.1	0.829637	Histone
205479_s_at	PLAU	0.0648086	2.04373	0.0317109	26.3673	included	no	74.5	0.644533	Stroma
217448_s_at	C14orf92	0.070226	2.04359	0.0343641	26.3673	included	no	158.5	0.194496	unclassified
216607_s_at	CYP51A1	0.0610302	2.04317	0.0298703	26.3673	included	no	109.3	0.282619	Histone
210619_s_at	HYAL1	0.0894508	2.04158	0.0438146	26.3673	included	no	52.8	0.140261	unclassified
214540_at	HIST1H2BO	0.0987949	2.03927	0.0484462	26.3673	included	no	41.6	0.618773	Histone
216549_s_at	TBC1D22B	0.0963561	2.0391	0.0472542	26.3673	included	no	102.9	-0.253167	HOX
219478_at	WFDC1	0.110678	2.03665	0.0543431	26.3673	included	no	46.8	0.383544	Stroma
209624_s_at	MCCC2	0.0783009	2.03424	0.0384916	26.3673	included	no	73.7	0.448301	Apocrine
212575_at	C19orf6	0.102124	2.03387	0.0502115	26.3673	included	no	177.2	-0.218261	HOX
222379_at	KCNE4	0.0819363	2.03125	0.0403378	26.3673	included	no	31.2	0.480889	Stroma
211924_s_at	PLAUR	0.0696973	2.03024	0.0343296	26.3673	included	no	47.8	0.394202	IL8
221933_at	NLGN4X	0.114205	2.02981	0.0562639	26.3673	included	no	31	0.269198	Stroma
220414_at	CALML5	0.160892	2.02888	0.0793007	26.3673	included	no	24.1	0.423344	CLDN3
215976_at	DBC1	0.086876	2.02649	0.0428702	26.3673	included	no	42.2	-0.167099	unclassified
210546_x_at	CTAG1B	0.183293	2.02542	0.0904964	26.3673	included	no	47.8	0.193328	unclassified
216712_at	SLC25A30	0.0857994	2.02015	0.0424717	26.3673	included	no	65.8	-0.196633	unclassified
220106_at	NPC1L1	0.0742086	2.01973	0.036742	26.3673	included	no	47	0.135678	unclassified
212898_at	KIAA0406	0.0513179	2.0193	0.0254137	26.3673	included	no	55.8	-0.314769	MHC2
202213_s_at	CUL4B	0.0539669	2.01857	0.0267352	26.3673	included	no	118.2	-0.233987	MHC1
216830_at	- - -	0.0782556	2.01724	0.0387935	26.3673	included	no	35.2	-0.168817	unclassified
204325_s_at	NF1	0.0496922	2.01702	0.0246364	26.3673	included	no	73.8	-0.138757	unclassified
215423_at	- - -	0.0667254	2.01646	0.0330904	26.3673	included	no	48.5	-0.228083	IFN
205228_at	RBMS2	0.077317	2.01345	0.0384003	26.3673	included	no	82.8	0.243921	Stroma
208083_s_at	ITGB6	0.106844	2.01144	0.0531183	26.3673	included	no	40.7	0.311037	Apocrine
218182_s_at	CLDN1	0.102244	2.01089	0.0508452	26.3673	included	no	37.6	0.331312	CLDN3

## Sheet: Good_Progn
Suppl. Table S3b: SAM-Result Good Prognosis Marker
Affy_ID	GeneSymbol	Numerator(r)	Score(d)	Denominator(s+s0)	q-value(%)	264probe_Signature_FDR_25%	26probe_Signature_FDR_3.5%	Kruskal-Wallis rank sum statistics	Max. correlation to metagene	Assigned to metagene (corr. cutoff 0.2)
209591_s_at	BMP7	-0.154474	-3.40527	0.0453632	21.0893	included	no	41.1	0.172564	unclassified
221671_x_at	IGKC	-0.144454	-3.11841	0.0463228	21.0893	included	no	27	0.790099	B.Cell
211333_s_at	FASLG	-0.0743936	-3.10668	0.0239463	21.0893	included	no	54.1	0.328361	MHC1
221651_x_at	IGKC	-0.136456	-3.0974	0.044055	21.0893	included	no	28.2	0.794608	B.Cell
211259_s_at	BMP7	-0.134775	-3.04101	0.0443193	21.0893	included	no	131.4	0.239619	Prolif
218872_at	TSC	-0.141529	-3.01928	0.0468751	21.0893	included	no	75.1	0.370692	T.Cell
209460_at	ABAT	-0.121964	-3.01008	0.0405186	21.0893	included	no	40.5	0.325884	Apocrine
217455_s_at	SSTR2	-0.0818585	-2.89032	0.0283216	21.0893	included	no	56.3	0.167645	unclassified
208479_at	KCNA1	-0.0998571	-2.8828	0.034639	21.0893	included	no	94.3	0.135885	unclassified
205890_s_at	UBD	-0.187531	-2.85966	0.0655779	21.0893	included	no	34.4	0.634044	MHC1
221087_s_at	APOL3	-0.0762267	-2.84294	0.0268126	21.0893	included	no	41.7	0.635949	MHC2
210321_at	GZMH	-0.149809	-2.81968	0.05313	21.0893	included	no	44.6	0.584246	T.Cell
214510_at	GPR20	-0.124448	-2.77659	0.0448205	26.3673	included	no	115	-0.177747	unclassified
211430_s_at	IGH@	-0.155406	-2.76131	0.0562799	26.3673	included	no	21.9	0.82799	B.Cell
214567_s_at	XCL1	-0.171349	-2.75903	0.0621049	26.3673	included	no	75.9	0.705229	T.Cell
217143_s_at	TRA@	-0.129485	-2.72192	0.0475713	26.3673	included	no	61.8	0.654613	T.Cell
207796_x_at	KLRD1	-0.0859556	-2.6896	0.0319585	26.3673	included	no	49.4	0.377805	T.Cell
214677_x_at	IGL@	-0.145733	-2.6883	0.05421	26.3673	included	no	18.1	0.831837	B.Cell
203915_at	CXCL9	-0.152196	-2.68054	0.0567781	26.3673	included	no	44.3	0.693828	T.Cell
208498_s_at	AMY2A	-0.140567	-2.67882	0.0524736	26.3673	included	no	32.4	-0.198327	unclassified
219605_at	ZNF3	-0.0861084	-2.67742	0.032161	26.3673	included	no	56.6	-0.127594	unclassified
209138_x_at	IGLC2	-0.148956	-2.66098	0.0559778	26.3673	included	no	18.1	0.869096	B.Cell
209590_at	BMP7	-0.100674	-2.65355	0.0379395	26.3673	included	no	29.8	0.168212	unclassified
204781_s_at	FAS	-0.0774107	-2.65263	0.0291826	26.3673	included	no	36.2	0.462736	T.Cell
217378_x_at	LOC391427	-0.212064	-2.64071	0.0803056	26.3673	included	no	35.1	0.954706	B.Cell
218062_x_at	CDC42EP4	-0.0831891	-2.6314	0.031614	26.3673	included	no	28.3	0.266053	IFN
212272_at	LPIN1	-0.100673	-2.62441	0.0383604	26.3673	included	no	82.4	-0.336647	Stroma
203608_at	ALDH5A1	-0.107959	-2.62141	0.0411837	26.3673	included	no	33.1	-0.226741	Hemoglobin
207747_s_at	DOK4	-0.0860942	-2.61869	0.0328768	26.3673	included	no	19	-0.113561	unclassified
